# Supplementary material
Source: PubMed Central journal article supplement (PMC4761853)
Supplement: Supp_Figure1.pdf [file Supp_Figure1.pdf]

## Supplementary Data

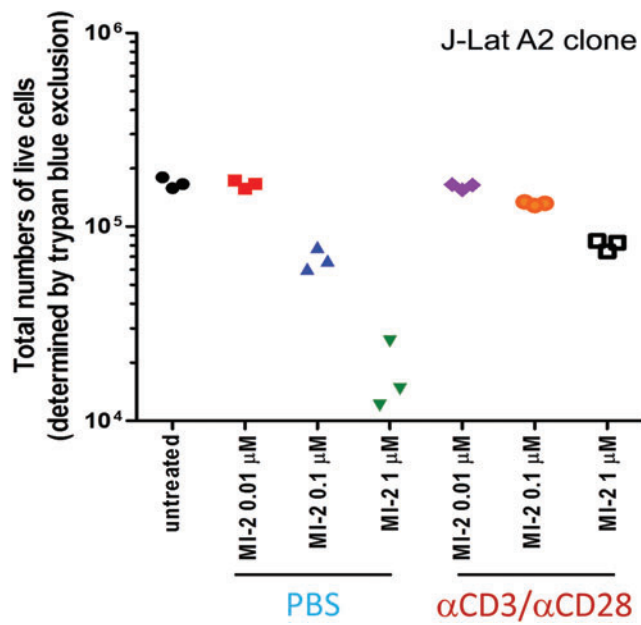

**SUPPLEMENTARY FIG. S1.**  $1 \times 10^5$  J-Lat A2 cells in triplicates were left untreated or treated as indicated for 48 h. At the end of the experiment, cells were counted by trypan blue exclusion of dead cells. Total number of live cells were plotted.
