# Supplementary material
Source: PubMed Central journal article supplement (PMC4761853)
Supplement: Supp_Figure2.pdf [file Supp_Figure2.pdf]

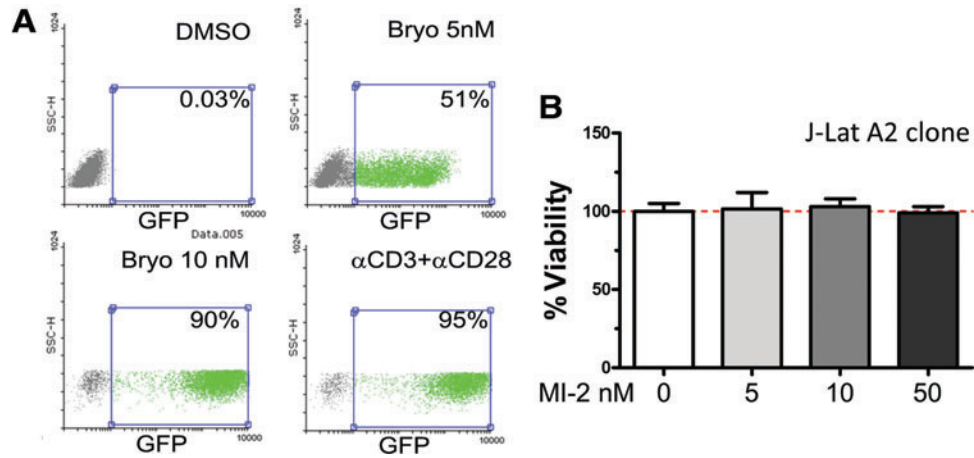

**SUPPLEMENTARY FIG. S2.** Bryostatins 1 treatment reactivates proviral transcription. **(A)** J-Lat A2 cells were stimulated by bryostatins 1 or  $\alpha$ CD3/ $\alpha$ CD28 for 48 h. Quantification of GFP<sup>+</sup> cells was done by flow cytometry. **(B)** J-Lat Tat-GFP A2 cells were seeded at  $0.25 \times 10^6$ /ml and were left untreated or treated with bryostatins at 5, 10, and 50 nM concentrations for 48 h. Cell viabilities were measured using the Promega CellTiter-Glo luminescent cell viability assay kit. The *red dotted line* indicates 100% viability.
